# Supplementary material
Source: publisher site journal article supplement (https://neobiota.pensoft.net/article/30392/download/suppl/35/)
Supplement: Supplementary file 1

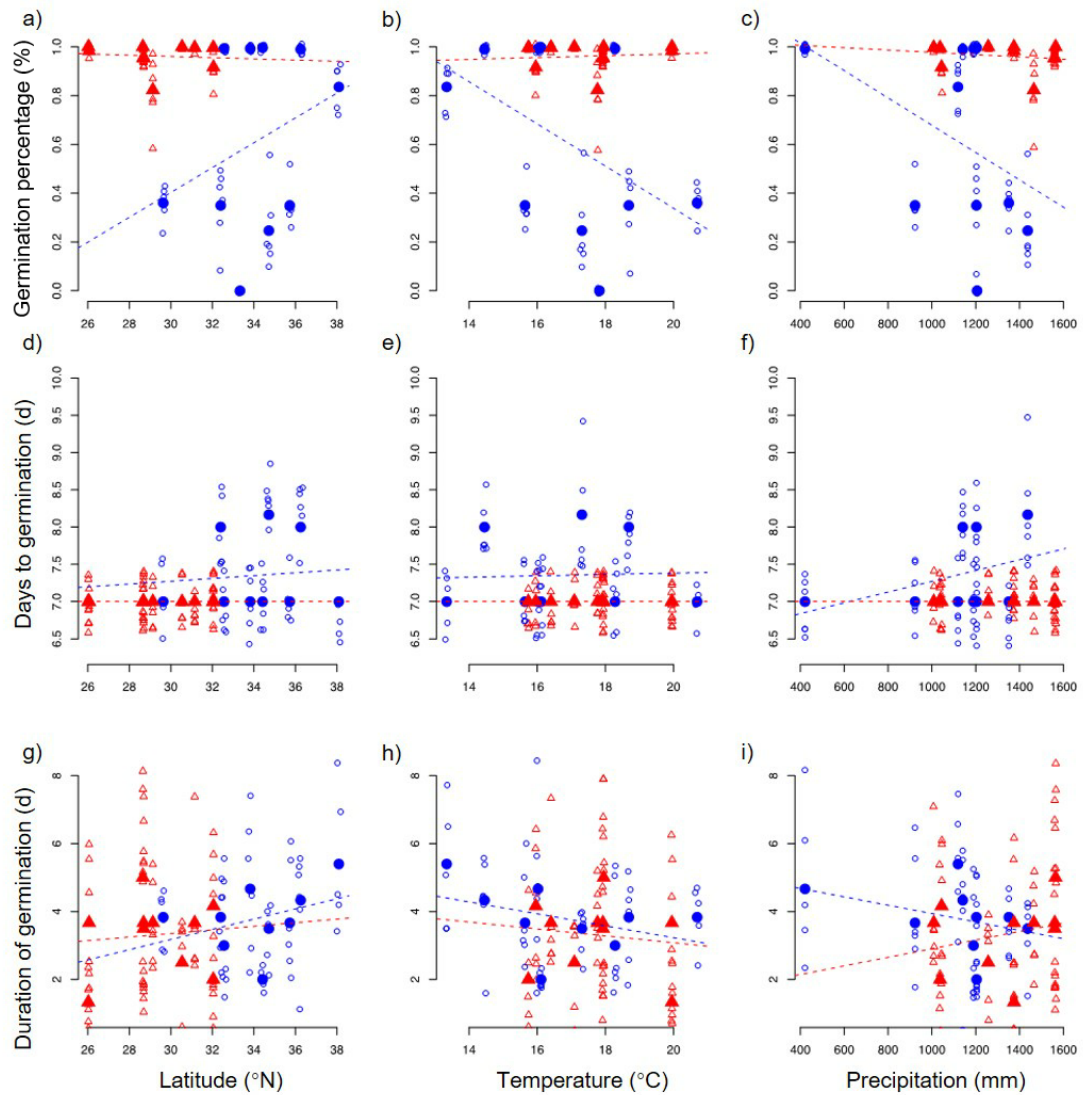

Fig. S4 Relationships between the germination traits and environmental variables for introduced (China; red triangles) and native (USA; blue circles) populations of *P. virginica*: germination rate with latitude (a), annual mean temperature (b) and annual precipitation (c); Days to germination with latitude (d), annual mean temperature (e) and annual precipitation (f); Duration of germination and latitude (g), annual mean temperature (h) and annual precipitation (i). Each hollow point represents one replicate in the experiment, and solid points are population means. Climate was quantified at the population scale. Dashed lines show univariate regression trends, but none was statistically significant, including in mixed models.
